# Supplementary material for: Integration of Mn-ZnFe2O4 with S-g-C3N4 for Boosting Spatial Charge Generation and Separation as an Efficient Photocatalyst
Source: MDPI journal article supplement (doi:10.3390/molecules27206925), 2022-10-15
Supplement: s1 [file s1]

## Supporting Information

### Integration of Mn-ZnFe<sub>2</sub>O<sub>4</sub> with S-g-C<sub>3</sub>N<sub>4</sub> for boosting spatial charge generation and separation as efficient photocatalyst

Mohsin Javed<sup>1</sup>, Waleed Bin Khalid<sup>1</sup>, Shahid Iqbal<sup>2\*</sup>, Muhammad Azam Qamar<sup>1</sup>, Hamad Alrbyawi<sup>3</sup>, Nasser S. Awwad<sup>4</sup>, Hala A. Ibrahim<sup>5,6</sup>, Murefah Mana Al-Anazy<sup>7</sup>, Eslam B. Elkaeed<sup>8</sup>, Rami Adel Pashameah<sup>9</sup>, Eman Alzahrani<sup>10</sup>, Abd-ElAzim Farouk<sup>11</sup>

<sup>1</sup>Department of Chemistry, School of Science, University of Management and Technology, Lahore 54770, Pakistan.

<sup>2</sup>Department of Chemistry, School of Natural Sciences (SNS), National University of Science and Technology (NUST), H-12, Islamabad, 46000, Pakistan.

<sup>3</sup>Pharmaceutics and Pharmaceutical Technology Department, College of Pharmacy, Taibah University, Medina Saudi Arabia.

<sup>4</sup>Chemistry Department, Faculty of Science, King Khalid University, P.O. Box 9004, Abha 61413, Saudi Arabia.

<sup>5</sup>Biology Department, Faculty of Science, King Khalid University, P.O. Box 9004, Abha 61413, Saudi Arabia.

<sup>6</sup>Department of Semi Pilot Plant, Nuclear Materials Authority, P.O. Box 530, El Maadi, Egypt.

<sup>7</sup>Department of Chemistry, College of Science, Princess Nourah bint Abdulrahman University, P.O. Box 84428, Riyadh 11671, Saudi Arabia.

<sup>8</sup>Department of Pharmaceutical Sciences, College of Pharmacy, AlMaarefa University, Riyadh 13713, Saudi Arabia.

<sup>9</sup>Department of Chemistry, Faculty of Applied Science, Umm Al-Qura University, Makkah 24230, Saudi Arabia.

<sup>10</sup>Department of Chemistry, College of Science, Taif University, P.O. Box 11099, Taif 21944, Saudi Arabia.

<sup>11</sup>Department of Biotechnology College of Science, Taif University, P.O. Box 11099, Taif 21944, Saudi Arabia.

**\*To whom corresponding should be addressed**

shahidgcs10@yahoo.com (Shahid Iqbal)

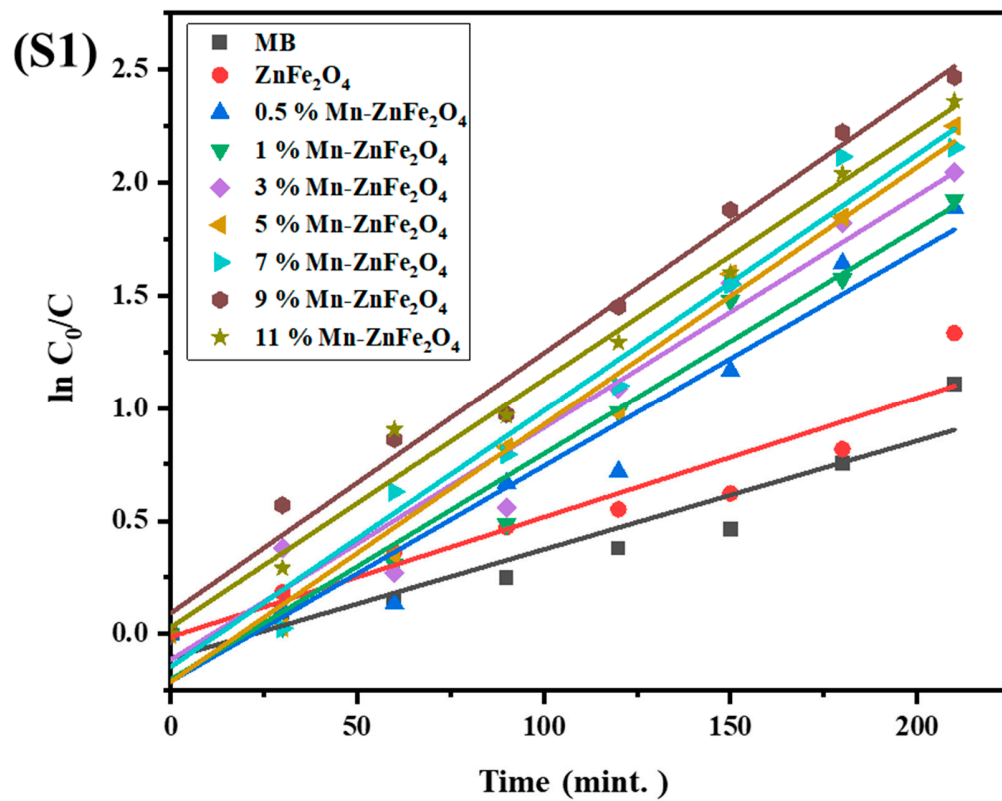

**Figure S1** First-order kinetics plot of ZnFe<sub>2</sub>O<sub>4</sub> and Mn-ZnFe<sub>2</sub>O<sub>4</sub> NPs.

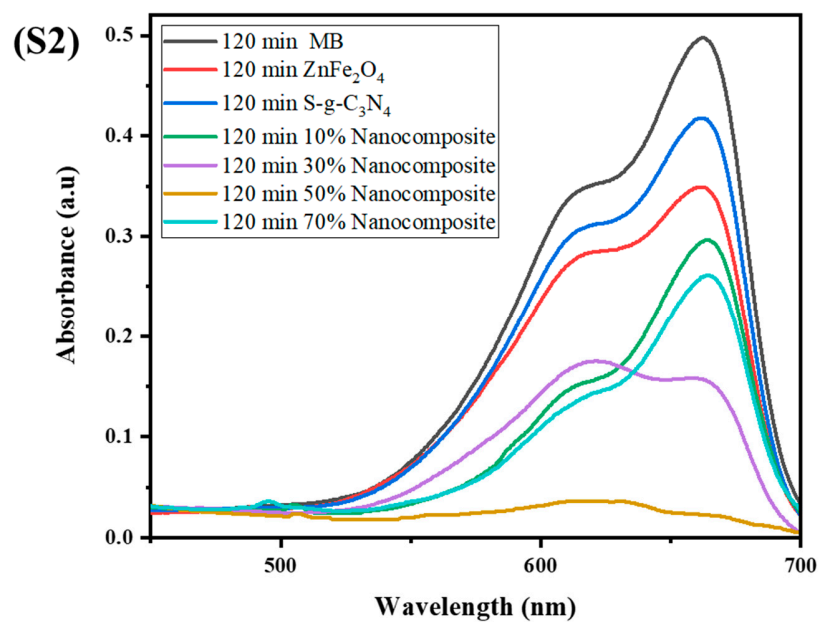

**Figure S2** Photodegradation of MB by Mn-ZnFe<sub>2</sub>O<sub>4</sub>/S-g-C<sub>3</sub>N<sub>4</sub> NCs after 120 minutes of sunlight irradiation (Degradation contours)

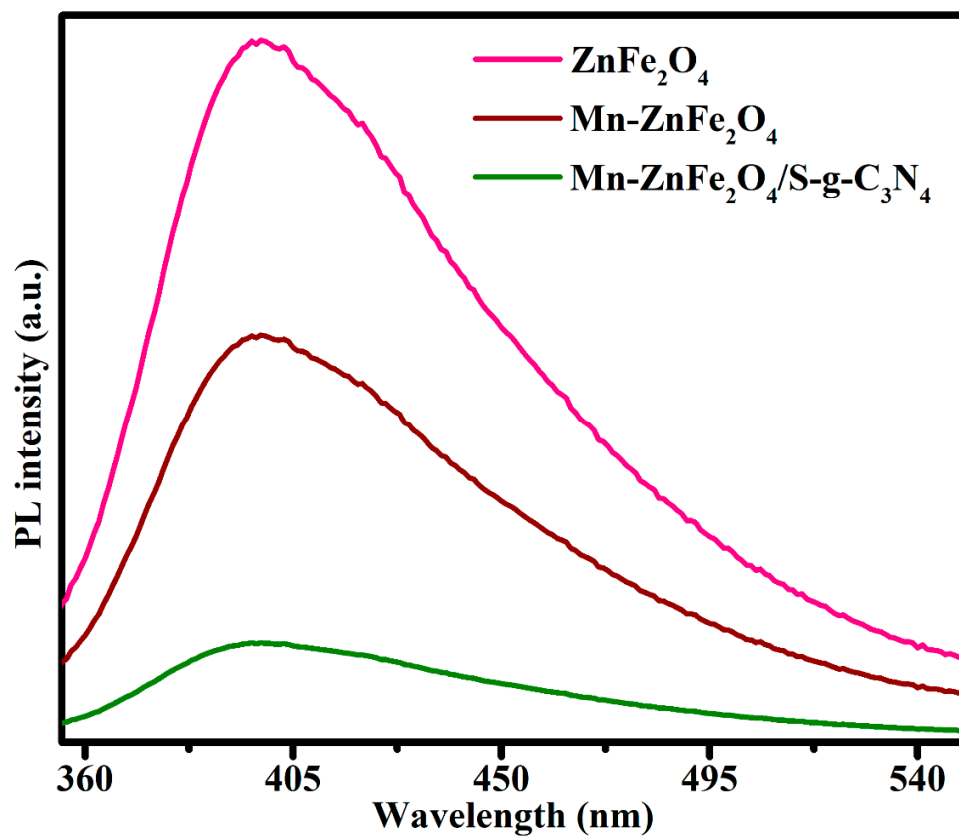

**Figure S3.** PL spectra of  $\text{ZnFe}_2\text{O}_4$ ,  $\text{Mn-ZnFe}_2\text{O}_4$  and  $\text{Mn-ZnFe}_2\text{O}_4/\text{S-g-C}_3\text{N}_4$  heterostructures at an excitation wavelength of 330 nm.
